# Supplementary material for: Orexin modulates behavioral fear expression through the locus coeruleus
Source: PubMed Central journal article supplement (PMC5694764; doi:10.1038/s41467-017-01782-z), 2017-11-20
Supplement: 41467_2017_1782_MOESM1_ESM.pdf [file 41467_2017_1782_MOESM1_ESM.pdf]

# Supplementary information

## Supplementary figures

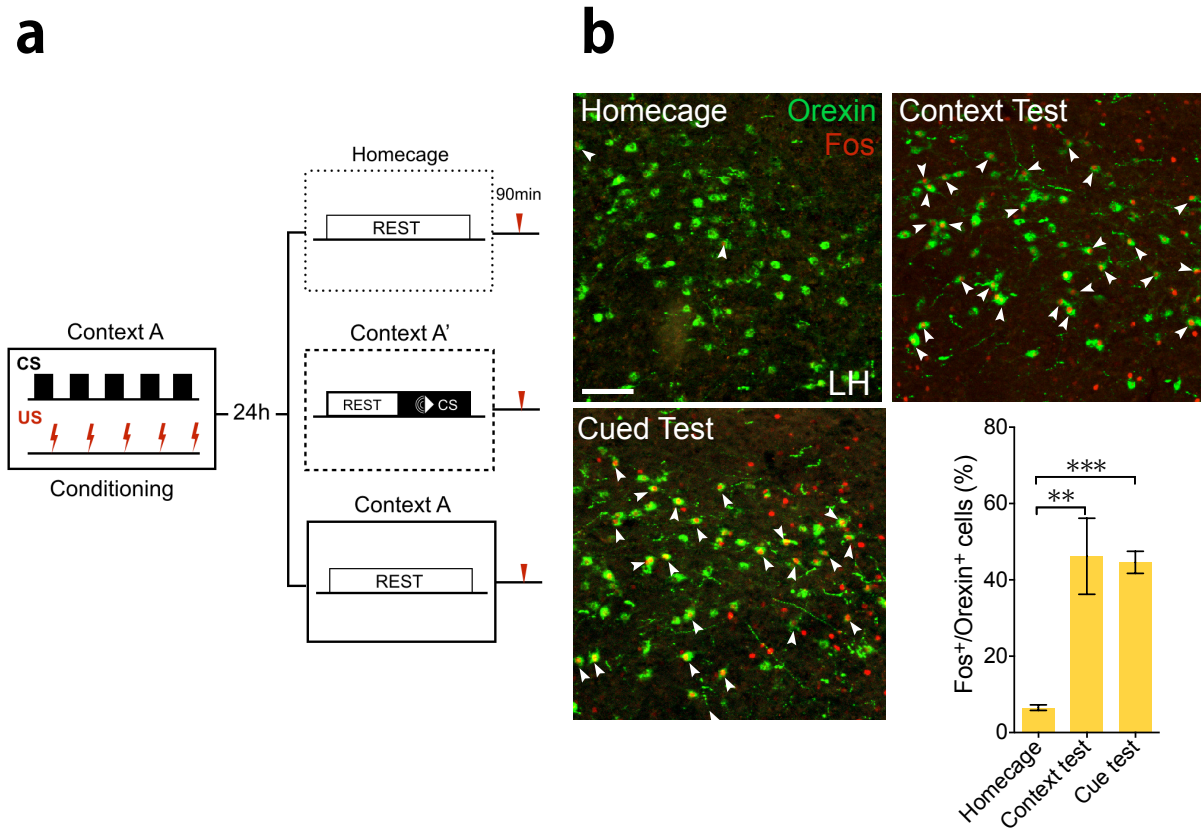

Supplementary Fig. 1 | Orexin neurons are activated by emotionally salient cues and contexts. (a) Experimental protocol. (b) Images show Fos immunoreactivity in orexin neurons in cued ( $n = 4$ ) and contextual ( $n = 3$ ) fear test compared to home cage control ( $n = 3$ ) at 24 h after conditioning (Homecage,  $n = 4$ ; Context test,  $n = 3$ ; Cued test,  $n = 4$ : One-Way ANOVA with Sidak's post-hoc test,  $F_{(2, 8)} = 21.81$ ,  $p = 0.0006$ ). Values are presented as mean  $\pm$  SEM. \*\* $p < 0.01$ , \*\*\* $p < 0.001$ . Scale bar, 100  $\mu\text{m}$ .

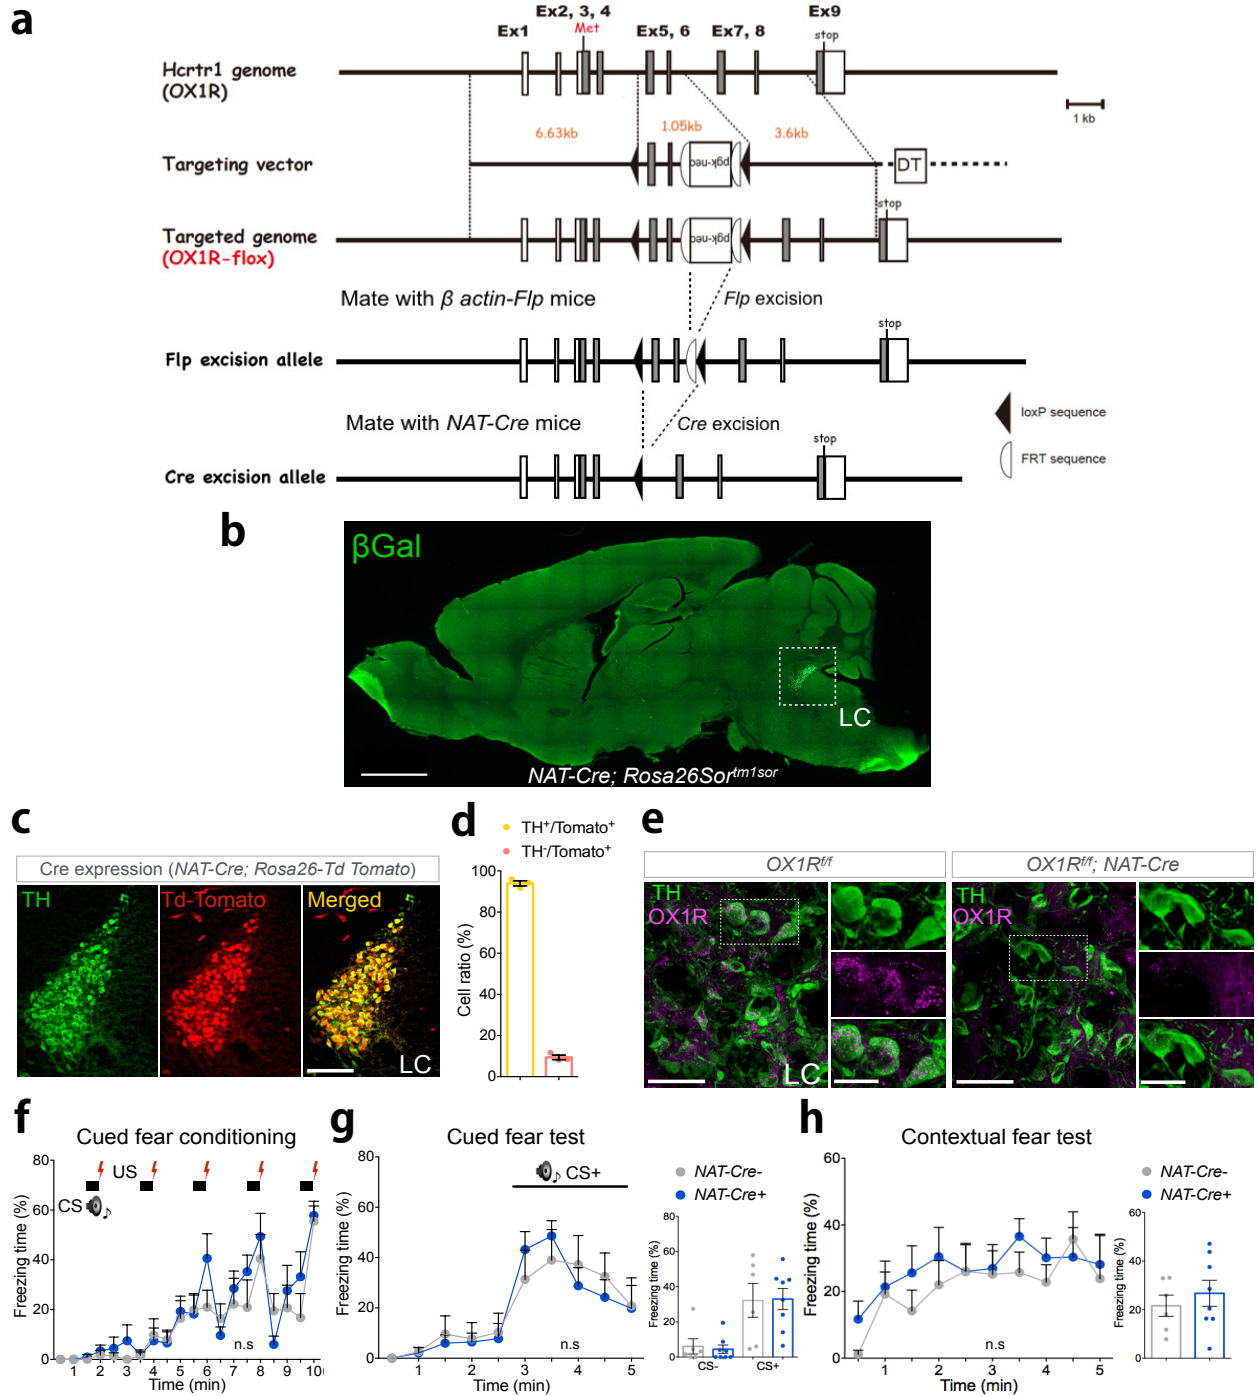

14

15 Supplementary Fig. 2 | Generation and analysis of *OX1R* floxed mouse. (a) Schematic  
 16 representation of strategy to generate *OX1R*<sup>fl/fl</sup> mice. Mice containing targeted allele were  
 17 mated with *Flp* mice to remove the *Neo* cassette. Then, these mice were crossed with *NAT-*  
 18 *Cre* mice to excise Exons 5 and 6 especially in NA<sup>LC</sup> neurons. (b) Specific Cre expression in  
 19 NA<sup>LC</sup> neurons in *NAT-Cre* mated with *Rosa26Sor*<sup>tm1sor</sup> mice stained with β-galactosidase  
 20 antibody. Scale bar, 2 mm. (c) Cre-mediated recombination in NA<sup>LC</sup> neurons of *NAT-Cre*  
 21 mice mated with *Rosa26-Td Tomato* reporter mice is visualized by red fluorescence. Scale

22 bar, 100  $\mu\text{m}$ . (d) Most of the TH-positive neurons in LC were Td-Tomato positive ( $96.01 \pm$   
23  $0.7\%$ ,  $n = 3$ ) and there were a few population of the TH-negative and Td-Tomato positive  
24 cells around LC ( $9.39 \pm 1.1\%$ ,  $n = 3$ ). (e) We confirmed specific deletion of *OXIR* mRNA in  
25  $\text{NA}^{\text{LC}}$  neurons with combination of *in situ* hybridization and immunohistochemistry for  
26 detecting *OXIR* and TH. Scale bars, 50  $\mu\text{m}$  (Left, low magnified), 25  $\mu\text{m}$  (Right, high  
27 magnified). (f-h) *NAT-Cre* mice showed normal freezing response in cued fear conditioning  
28 (*NAT-Cre*<sup>-</sup>;  $n = 6$ , *NAT-Cre*<sup>+</sup>;  $n = 8$ : Two-Way RM ANOVA, Sidak's post-hoc test,  $F_{(1, 12)} =$   
29  $0.4461$ ,  $p = 0.5168$ ), cued fear test (Freezing overtime: Two-Way RM ANOVA, Sidak's  
30 post-hoc test,  $F_{(1, 12)} = 0.0036$ ,  $p = 0.9529$ , left; Average freezing: Average freezing: unpaired  
31 two-tailed Student's *t*-test,  $t = 0.0667$ ,  $p = 0.9483$ , right) and contextual fear test (Freezing  
32 overtime: Two-Way RM ANOVA, Sidak's post-hoc test,  $F_{(1, 12)} = 0.4973$ ,  $p = 0.4941$ , left;  
33 Average freezing: Average freezing: unpaired two-tailed Student's *t*-test,  $t = 0.7420$ ,  $p =$   
34  $0.4724$ , right) . Values are presented as mean  $\pm$  SEM.

35

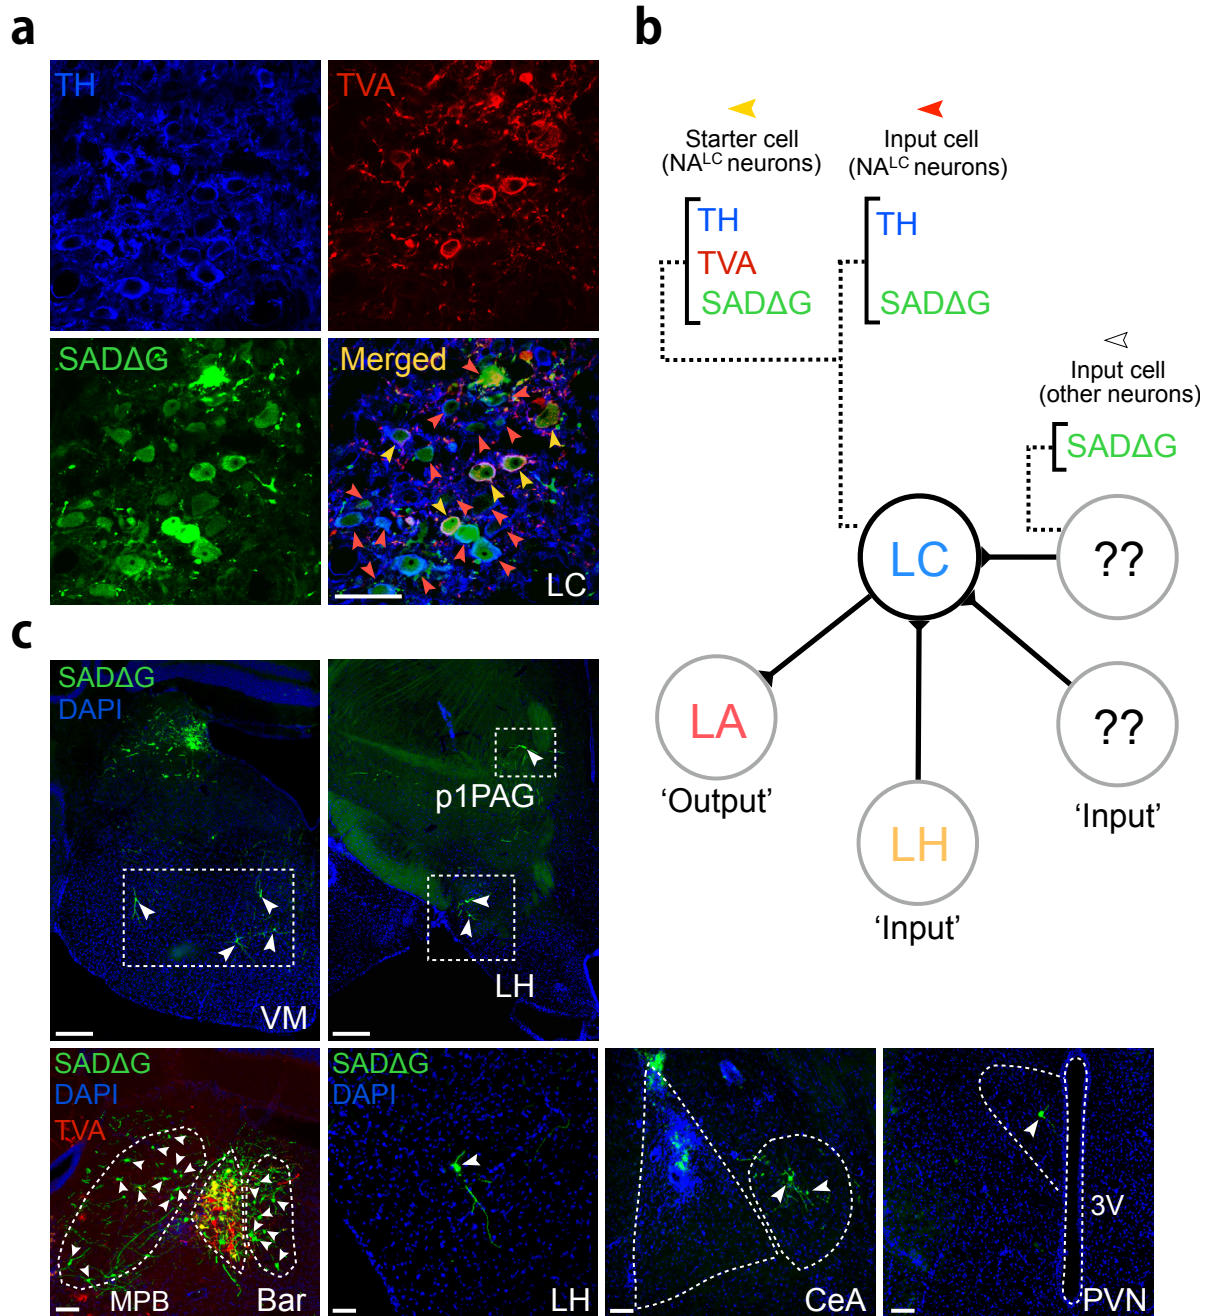

36

37 Supplementary Fig. 3 | Input of  $NA^{LC \rightarrow LA}$  neurons revealed by cTRIO method. (a) Images  
 38 show  $TH^+/TVA^+/SAD\Delta G^+$  cells (starter cells: yellow arrow heads) and  $TH^+/SAD\Delta G^+$  cells  
 39 [ $input\ cells\ (NA^{LC})$ : red arrow heads]. Scale bar, 50  $\mu m$ . (b) Cartoon showing classification of  
 40 starter cells ( $NA^{LC}$  neurons), input cells ( $NA^{LC}$  neurons) and input cells of other neurons  
 41 ( $SAD\Delta G^+$  cells; white arrow heads). (c) Images showing input cells in the ventral medulla  
 42 (VM), medial parabrachial nucleus (MPB), Barrington's nucleus (Bar), periaqueductal gray  
 43 (p1PAG), lateral hypothalamus (LH), central amygdala (CeA), and Paraventricular nucleus  
 44 (PVN). Scale bars, 300  $\mu m$  (upper), 100  $\mu m$  (lower).

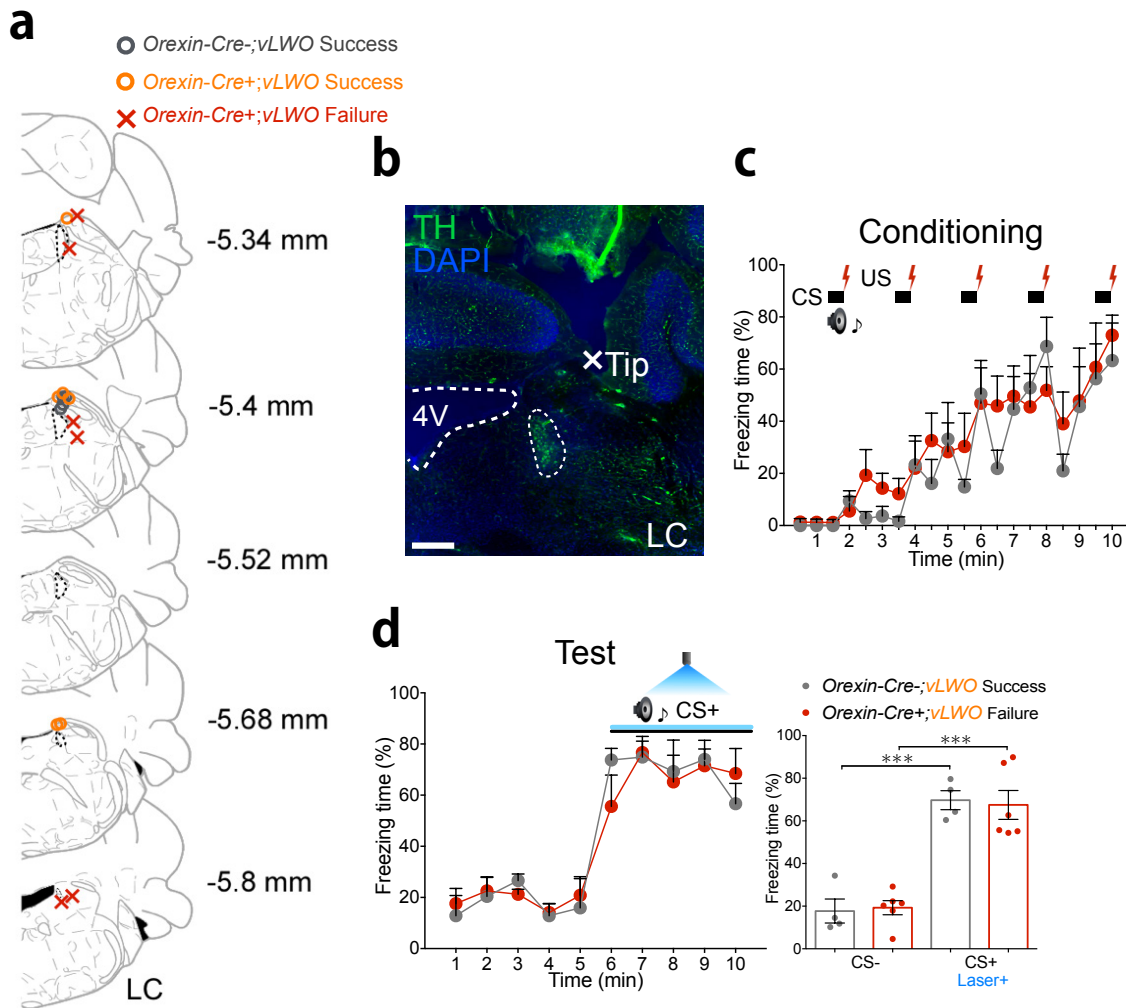

46

47 Supplementary Fig. 4 | Trials with failed optical fiber placement in vLWO-mediated inhibition

48 showed no effect on freezing behavior. (a) Positions of optical fiber tip placement. We

49 excluded the trial if the tip was not directly above the LC or the tip itself severely destroyed

50 LC. (b) Representative image showing failed tip placement stained with TH and DAPI. (c)

51 Results of fear conditioning with *Orexin-Cre-;vLWO* Success and *Orexin-Cre+;vLWO*52 Failure group, showing no difference between these groups (*Orexin-Cre-;vLWO* Success,  $n =$ 53 4; *Orexin-Cre+;vLWO* Failure,  $n = 6$ : Two-Way RM ANOVA, Sidak's post-hoc test,  $F_{(1, 8)} =$ 54 0.2584,  $p = 0.6249$ ). (d) The failed tip placement group showed significantly longer freezing55 time similar to the *Orexin-Cre-;vLWO* Success group (Freezing overtime: Two-Way RM56 ANOVA with Sidak's post-hoc test,  $F_{(1, 8)} = 0.0029$ ,  $p = 0.9582$ , left; Average freezing:57 unpaired two-tailed Student's  $t$ -test,  $t = 0.2748$ ,  $p = 0.7906$ , right). Values are presented as58 mean  $\pm$  SEM. \*\*\* $p < 0.001$ . Scale bar, 300  $\mu$ m.

59

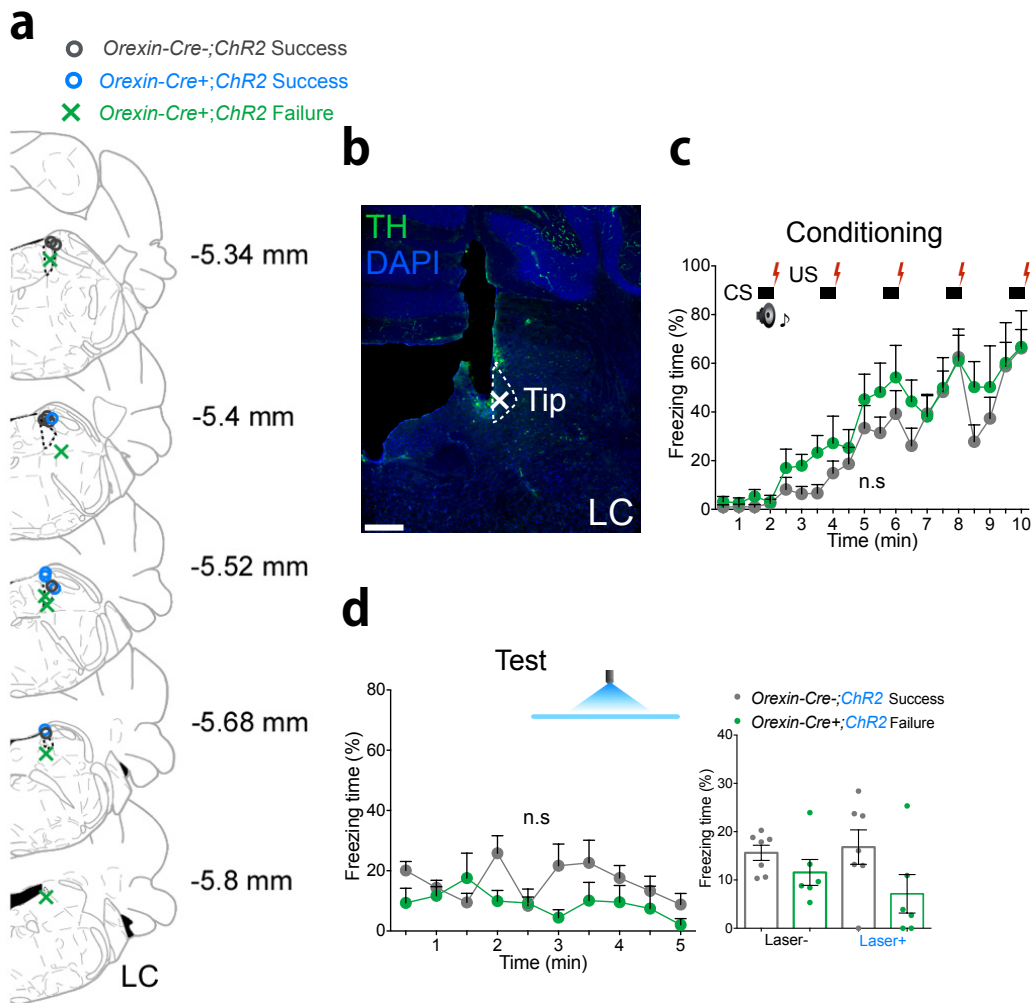

60

61 Supplementary Fig. 5 | ChR2-mediated stimulation of orexin fibers showed no effect on  
 62 freezing behavior. (a) Place of optical fiber tip at the LC for laser stimulation of orexin<sup>LH→LC</sup>  
 63 confirmed after cued fear conditioning. We excluded the trial if the tip was not precisely  
 64 placed above the LC or the tip itself severely destroyed the LC. (b) Representative image  
 65 showing failed tip placement stained with TH and DAPI. (c) Results of fear conditioning with  
 66 *Orexin-Cre-;ChR2* Success and *Orexin-Cre+;ChR2* Failure group showing no difference  
 67 between these groups (*Orexin-Cre-;ChR2* Success,  $n = 7$ ; *Orexin-Cre+;ChR2* Failure,  $n = 6$ :  
 68 Two-Way RM ANOVA, Sidak's post-hoc test,  $F_{(1, 11)} = 1.104$ ,  $p = 0.3160$ ). (d) The *Orexin-*  
 69 *Cre+;ChR2* Failure group with laser stimulation didn't show any increase in freezing time  
 70 similar to the *Orexin-Cre-;ChR2* Success group (Freezing over time: Two-Way RM ANOVA  
 71 with Sidak's post-hoc test,  $F_{(1, 11)} = 3.191$ ,  $p = 0.1016$ , left; Average freezing: unpaired two-  
 72 tailed Student's  $t$ -test,  $t = 1.808$ ,  $p = 0.0992$ , right). Values are presented as mean  $\pm$  SEM.  
 73 Scale bar, 300  $\mu$ m.

74

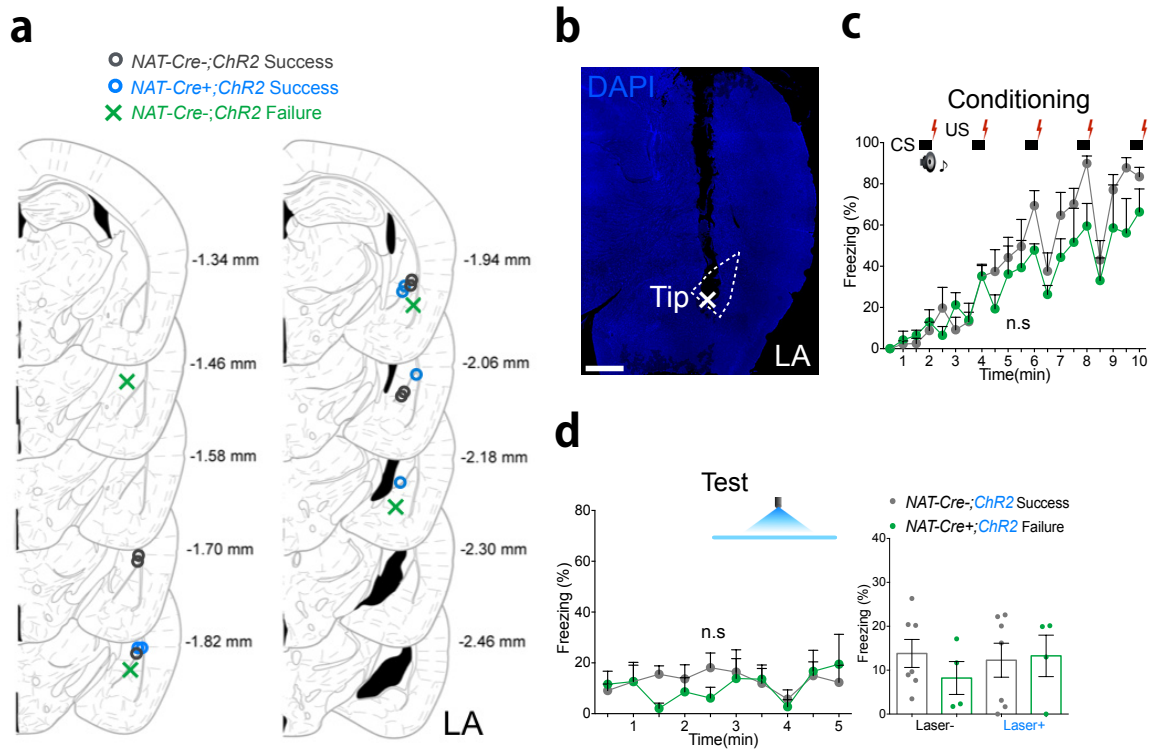

75

76 Supplementary Fig. 6 | Trials with failed optic fiber placement showed no effect on freezing  
 77 behavior. (a) Summary of optical fiber tip placements for laser stimulation of  $NA^{LC \rightarrow LA}$  after  
 78 cued fear conditioning. We excluded the trial if the tip was not precisely above the LA or the  
 79 tip itself severely destroyed the LA. (b) Representative image showing failed tip placement  
 80 around the LA stained with DAPI. (c) Results of cued fear conditioning with *NAT-Cre-;ChR2*  
 81 Success and *NAT-Cre+;ChR2* Failure groups showing no difference between these groups  
 82 (*NAT-Cre-;ChR2* Success,  $n = 7$ ; *NAT-Cre+;ChR2* Failure,  $n = 4$ : Two-Way RM ANOVA,  
 83 Sidak's post-hoc test,  $F_{(1,9)} = 2.406$ ,  $p = 0.1553$ ). (d) The *NAT-Cre+;ChR2* Failure group  
 84 didn't show any increase in freezing time with laser stimulation similar to the *NAT-*  
 85 *Cre-;ChR2* Success group (Freezing over time: Two-Way RM ANOVA, Sidak's post-hoc  
 86 test,  $F_{(1,9)} = 0.1852$ ,  $p = 0.6770$ , left; Average freezing: unpaired two-tailed Student's  $t$ -test,  $t$   
 87  $= 0.1635$ ,  $p = 0.8749$ , right). Values are presented as mean  $\pm$  SEM. Scale bar, 600  $\mu$ m.

88

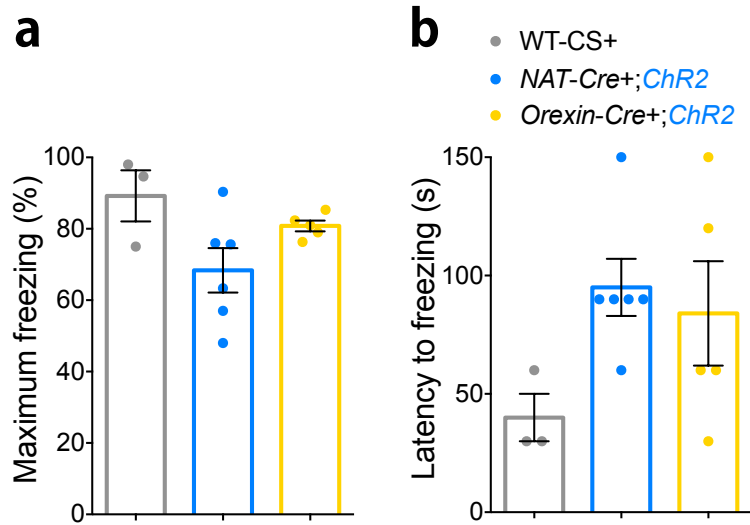

89

90 Supplementary Fig. 7 | Optogenetic stimulation of NA<sup>LC</sup> or orexin<sup>LH</sup> fibers induced increased  
 91 but delayed freezing behavior. (a) There was no difference in maximum freezing time  
 92 between ones induced by 150 s CS presentation or laser stimulation (WT-CS,  $n = 3$ ; *NAT-*  
 93 *Cre+;ChR2*,  $n = 6$ ; *Orexin-Cre+;ChR2*,  $n = 4$ : One-Way ANOVA with Tukey's post hoc test,  
 94  $F_{(2, 11)} = 3.492$ ,  $p = 0.0669$ ). (b) Photostimulation of NA<sup>LC</sup> neurons or orexin<sup>LH</sup> fibers showed  
 95 a tendency to induce a delayed freezing response compared with that induced by auditory CS  
 96 after cued fear conditioning (WT-CS,  $n = 3$ ; *NAT-Cre+;ChR2*,  $n = 6$ ; *Orexin-Cre+;ChR2*,  $n =$   
 97  $5$ : One-Way ANOVA with Tukey's post hoc test,  $F_{(2, 11)} = 2.333$ ,  $p = 0.1430$ ). Values are  
 98 presented as mean  $\pm$  SEM.

99



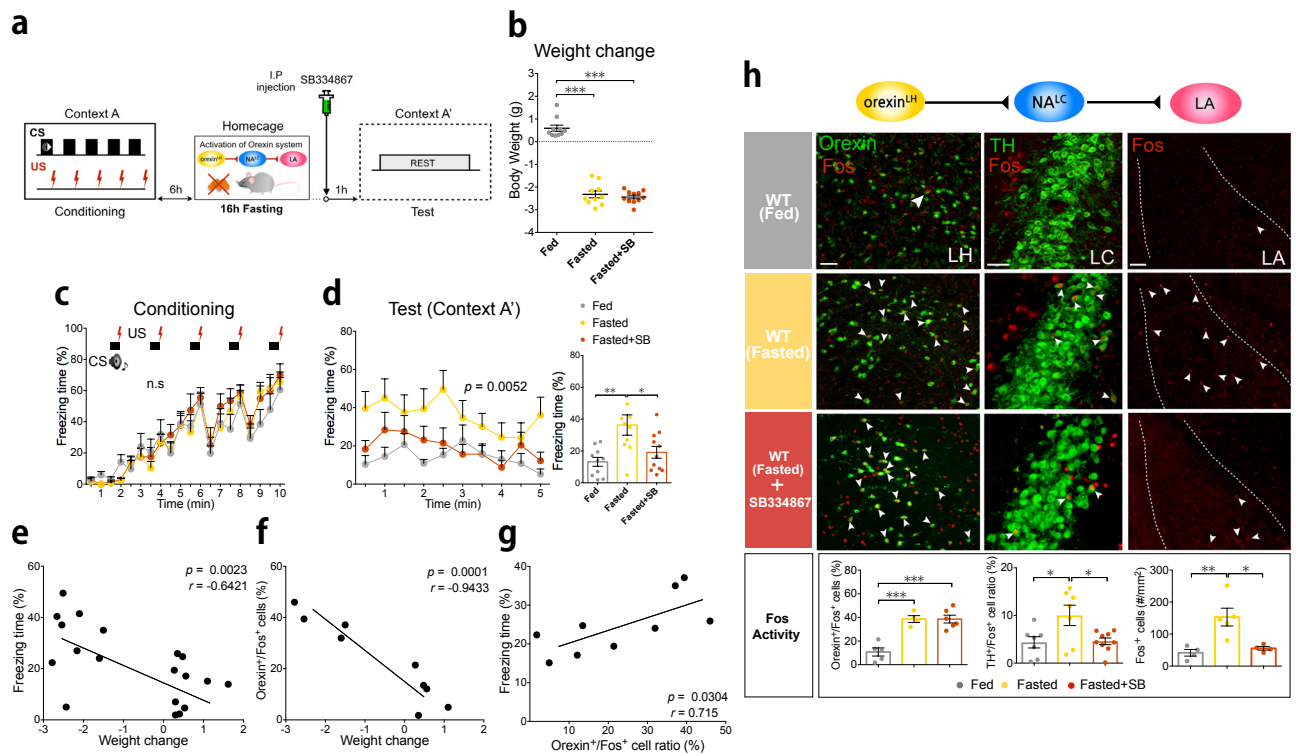

101

102 Supplementary Fig. 8 | Fasting increases freezing which is dependent on OX1R. (a)

103 Schematic representation of strategy of fasting manipulation (b) 16 h fasting induced

104 significant reduction of mouse's body weight (Fed,  $n = 10$ ; Fasted,  $n = 10$ ; Fasted+ SB,  $n =$

105 11: One-Way ANOVA with Sidak's post-hoc test,  $F_{(2, 28)} = 185.1$ ,  $p < 0.0001$ ). (c) Result of

106 cued fear conditioning before fasting (Two-Way RM ANOVA with Tukey's post-hoc test,  $F_{(2, 28)} = 0.2796$ ,  $p = 0.7582$ ).

107 (d) Fasted mice showed increased freezing time even in context

108 A' as compared to Fed mice. Fasted mice treated with SB334867(SB) showed almost the

109 same tendency to Fed mice (Two-Way RM ANOVA with Tukey's post hoc test,  $F_{(2, 28)} =$

110 6.374,  $p = 0.0052$ ). (e) Fasting-induced freezing was negatively correlated with the weight

111 change ( $n = 20$ ,  $r = -0.6421$ ,  $p = 0.0023$ ). (f) Activation of orexin<sup>LH</sup> neurons was negatively

112 correlated with the weight change ( $n = 9$ ,  $r = -0.9433$ ,  $p = 0.0001$ ). (g) Fasting-induced

113 freezing was positively correlated with the activation of orexin<sup>LH</sup> neurons ( $n = 9$ ,  $r = 0.715$ ,  $p$

114  $= 0.0304$ ). (h) orexin<sup>LH</sup> neurons, NA<sup>LC</sup> neurons and LA neurons were highly activated by

115 fasting condition, and intraperitoneal injection of SB334867 inhibited the activation of NA<sup>LC</sup>

116 and downstream LA neurons (orexin<sup>LH</sup>; Fed,  $n = 5$ ; Fasted,  $n = 4$ ; Fasted+SB,  $n = 6$ : One-

117 Way ANOVA with Sidak's post-hoc test,  $F_{(2, 12)} = 23.28$ ,  $p < 0.0001$ ; NA<sup>LC</sup>; Fed,  $n = 7$ ;

118 Fasted,  $n = 7$ ; Fasted+SB,  $n = 9$ : One-Way ANOVA with Tukey's post hoc test,  $F_{(2, 20)} =$

119 5.202,  $p = 0.0152$ ; LA; Fed,  $n = 4$ ; Fasted,  $n = 5$ ; Fasted+SB,  $n = 4$ : One-Way ANOVA with

120 Tukey's post hoc test,  $F_{(2,10)} = 9.967, p = 0.0042$ ). Images show the Orexin<sup>+</sup>/Fos<sup>+</sup> cells in  
 121 orexin neurons (left column), TH<sup>+</sup>/Fos<sup>+</sup> cells in NA<sup>LC</sup> neurons (center column), Fos<sup>+</sup> cells in  
 122 the LA region (mm<sup>2</sup>) (right column) in each group. Scale bars: 100 μm. Bottom figures show  
 123 the percentage of these cells in different regions regarding Fed, Fasted, Fasted+SB groups.  
 124 Values are presented as mean ± SEM. \*  $p < 0.05$ , \*\*  $p < 0.01$ , \*\*\*  $p < 0.001$ . Scale bar, 500  
 125 μm.

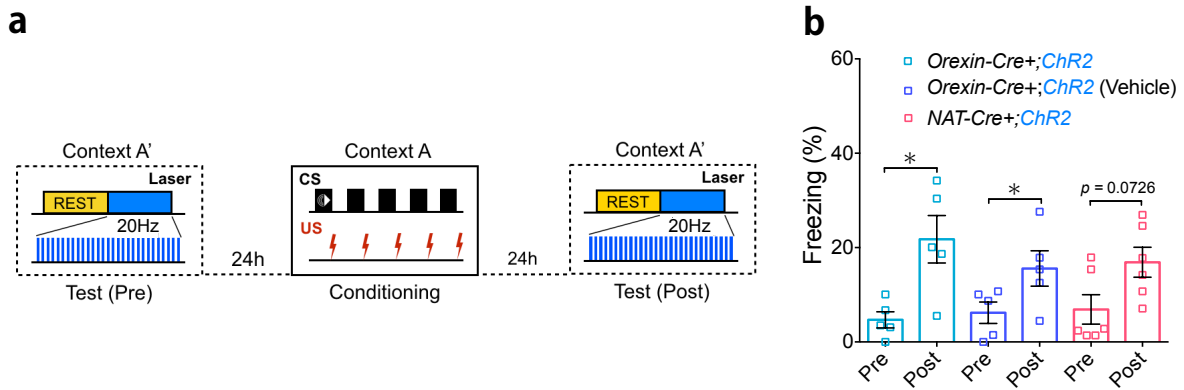

126

127 Supplementary Fig. 9 | Change of baseline freezing after fear conditioning. (a) Schematic  
 128 drawing showing experimental protocol. (b) Baseline freezing time significantly changed  
 129 because of the fear conditioning manipulation (*Orexin-Cre+;ChR2*,  $n = 5$ ; *Orexin-*  
 130 *Cre+;ChR2* (Vehicle),  $n = 5$ ; *NAT-Cre+;ChR2*,  $n = 6$ : Pre vs Post, unpaired two-tailed  
 131 Student's *t*-test,  $t = 3.216, p = 0.0241$ ;  $t = 2.247, p = 0.0484$ ;  $t = 2.136, p = 0.0726$ ). Values  
 132 are presented as mean ± SEM. \* $p < 0.05$ .
